# Supplementary material for: Aberrant expression of C1q, IL-6 and β-catenin in class VI lupus nephritis
Source: Research Square preprint supplement (doi:10.21203/rs.3.rs-3439470/v1), 2023-10-26
Supplement: Supplementary file 1 [file 95d6727968774e3da43dab23.docx]

**SUPPLEMENT INFORMATION**

**Supplemental Tables**

**Suppl. Table S1. Demographic and clinical parameters of SLE patients and healthy cohorts.**

| **Patient characteristic** | **Plasma** | | | **Urine** | | | **kidney tissue sections** |
| --- | --- | --- | --- | --- | --- | --- | --- |
| **SLE (n=107)** | **HC (n=69)** | ***P*-value** | **SLE (n=64)** | **HC (n=24)** | ***P*-value** | **LN (n=26)** |
| **Demographical features** | | | | | | | |
| Age (mean±SD)(range, year old) | 45.99±11.32 | 48.82±13.48 | 0.13 | 45.90±11.57 | 49.15±13.20 | 0.08 | 47.66±12.87 |
| Gender (male/female) | 50/65 | 37/45 | 0.82 | 55/60 | 30/52 | 0.12 | 18/8 |
| **Disease features** | | | | | | |  |
| Disease duration (mean±SD) | 10.23±6.24 |  |  | 10.54±6.33 |  |  | 9.98±5.97 |
| SLEDAI score (range) | 11.12±6.83 |  |  | 10.70±6.50 |  |  | 10.85±6.75 |
| **Clinical manifestations** | | | | | | | |
| Renal disorder (n,%) | 35 (32.71%) |  |  | 32 (50.00%) |  |  | 26 (100.00%) |
| **Treatment** | | | | | | | |
| Prednisone (n,%) | 89 (83.18%) |  |  | 50 (78.13%) |  |  | 11 (42.31) |
| Azathioprine (n,%) | 66 (61.68%) |  |  | 42 (65.62%) |  |  | 9 (34.62) |
| Antimalarial (n,%) | 64 (59.81%) |  |  | 24 (37.50%) |  |  | 8 (30.77) |
| Cydophosphamide (n,%) | 14 (13.08%) |  |  | 18 (28.13%) |  |  | 12 (46.15) |
| Methotrexate (n,%) | 21 (19.63%) |  |  | 25 (39.06%) |  |  | 7 (26.92) |
| **Laboratory** | | | | | | | |
| Anti-dsDNA (IU/Ml, mean±SD) | 54.52±8.02 |  |  | 60.81±9.45 |  |  | 56.72±8.77 |
| C3 (μg/mL, mean±SD) | 0.62±0.03 |  |  | 0.60±0.10 |  |  | 0.61±0.07 |
| C4 (μg/mL, mean±SD) | 0.12±0.01 |  |  | 0.11±0.01 |  |  | 0.12±0.01 |
| Anti-SM (positive) | 30 (28.03%) |  |  | 13 (20.31%) |  |  | 9 (34.62%) |
| Anti-SSA (positive) | 32 (29.91%) |  |  | 21 (32.81%) |  |  | 11 (42.31%) |
| Anti-SSB (positive) | 27 (25.23%) |  |  | 18 (28.13%) |  |  | 9 (34.62%) |
| U1RNP (positive) | 24 (22.43%) |  |  | 11 (17.19%) |  |  | 5 (19.23) |
| ACL (positive) | 26 (24.30%) |  |  | 9 (14.06%) |  |  | 3 (11.54) |
| PCNA (positive) | 18 (16.82%) |  |  | 8 (12.50%) |  |  | 4 (15.38) |

C3: Complement C3; C4: Complement C4; dsDNA: double-stranded DNA; ESR: erythrocyte sedimentation rate; SLE: Systemic lupus erythematosus; SLEDAI: SLE Disease Activity Index
